# Supplementary material
Source: Springer Nature journal article supplement (https://www.springermedizin.de/resource/supplementary/12891_2011_1573_MOESM2_ESM.pdf/9507894)
Supplement: MOESM2 [file 9507894]

|              | Adequate sequence generation? | Allocation concealment? | Blinding? | Incomplete outcome data addressed? | Free of selective reporting? | Free of other bias? |
|--------------|-------------------------------|-------------------------|-----------|------------------------------------|------------------------------|---------------------|
| Amick 2003   | -                             | -                       | +         | +                                  | +                            | -                   |
| Gadge 2007   | -                             | -                       | ?         | +                                  | +                            | ?                   |
| Herbert 2001 | -                             | -                       | +         | +                                  | +                            | -                   |
| Rempel 2007  | ?                             |                         | +         | +                                  | +                            | +                   |
| Wang 2008    | ?                             |                         | +         | +                                  | +                            | +                   |
